# Supplementary material for: Aerobic Oxidation of 5-Hydroxymethylfurfural (HMF) in Aqueous Medium over Fe-Doped-Poly(heptazine imide) Photocatalysts: Unveiling the Bad Role of Hydroxyl Radical Generation on the Catalytic Performance
Source: MDPI journal article supplement (doi:10.3390/molecules28248077), 2023-12-14
Supplement: s1 [file s1]

# **Aerobic Oxidation of 5-Hydroxymethylfurfural (HMF) in Aqueous Medium over Fe-Doped-Poly(heptazine imide) Photocatalysts: Unveiling the Bad Role of Hydroxyl Radical Generation on the Catalytic Performance**

José B. G. Filho<sup>a,b</sup>, Ingrid F. Silva<sup>c</sup>, Mamduoh Alafandi<sup>a</sup>, Jabor Rabeah<sup>a\*</sup>

<sup>a</sup>Leibniz Institute for Catalysis (LIKAT Rostock), D-18059, Rostock, Germany

<sup>b</sup>Chemistry Department, Federal University of Minas Gerais (UFMG), 31270-901 Belo Horizonte, MG, Brazil

<sup>c</sup>Department of Colloid Chemistry, Max Planck Institute of Colloids and Interfaces, Potsdam Science Park, Am Mühlenberg 1, D-14476 Potsdam, Germany

\*Corresponding author: Jabor.Rabeah@catalysis.de

## **Table of Contents**

|                                |     |
|--------------------------------|-----|
| Figures and related texts..... | 2-7 |
| Tables .....                   | 8   |
| References .....               | 9   |

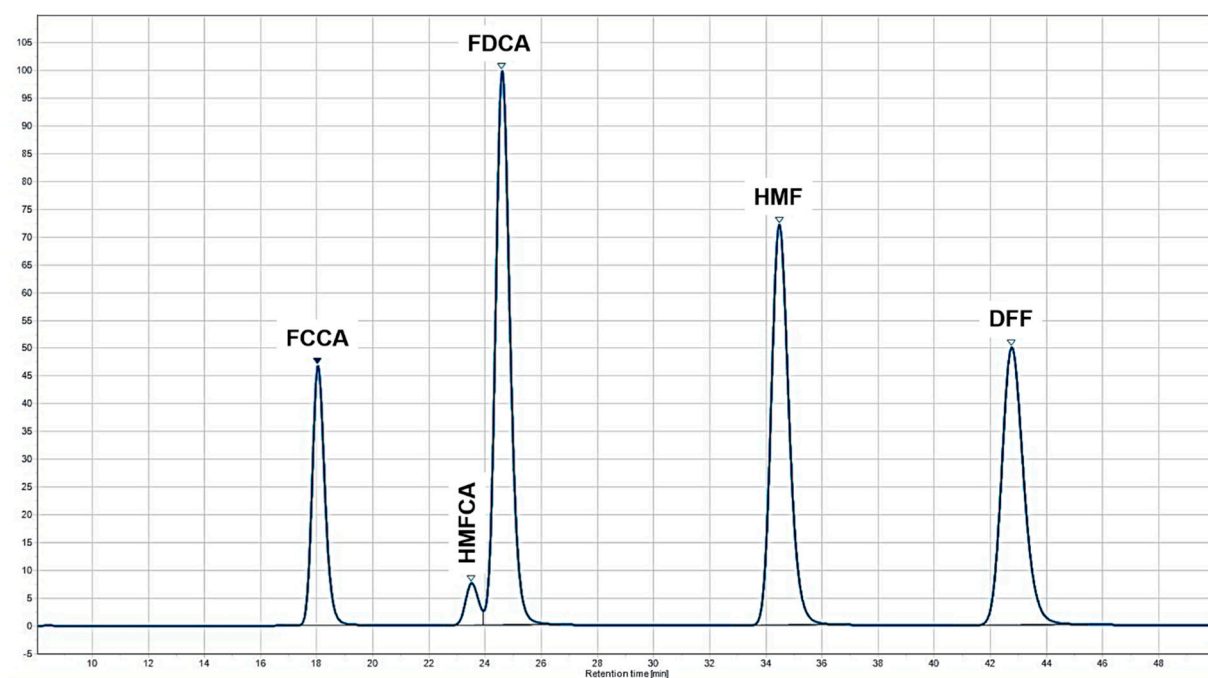

**Figure S1.** Chromatographic separation of HMF and its oxidation products using the method described in the experimental section.

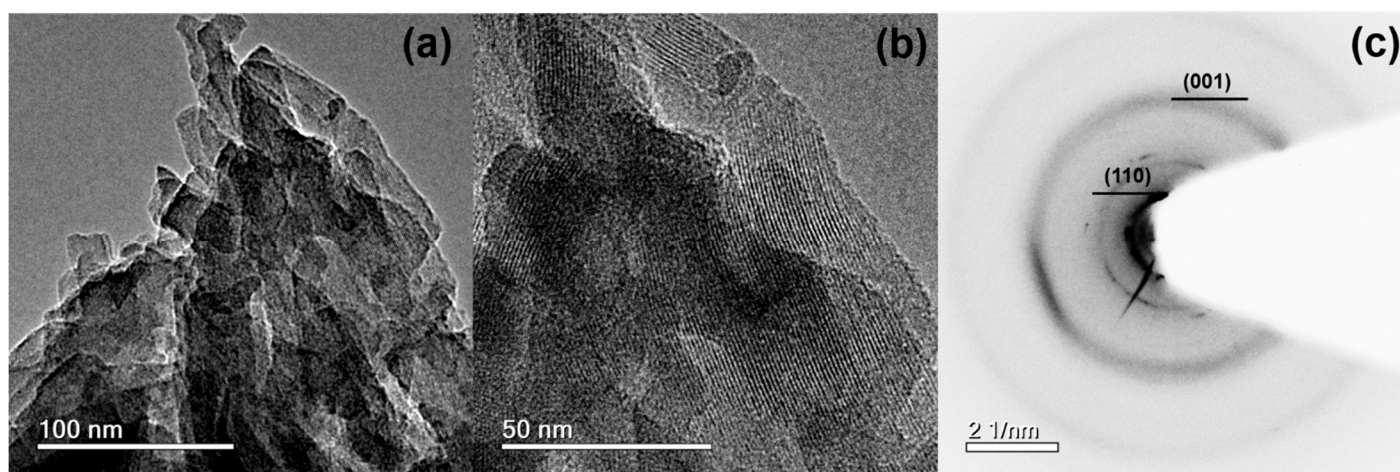

**Figure S2.** (a), (b) HR-TEM images of PHI(Na), (c) SAED of (b).

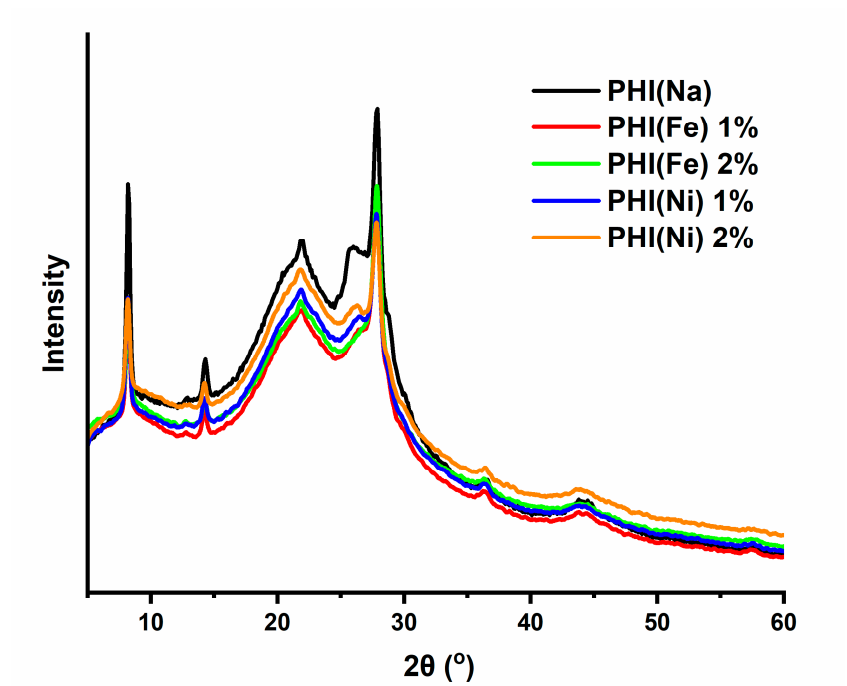

**Figure S3.** XRD powder pattern for PHI(Na), PHI(Fe) 1%, PHI(Fe) 2%, PHI(Ni) 1% and PHI(Ni) 2%.

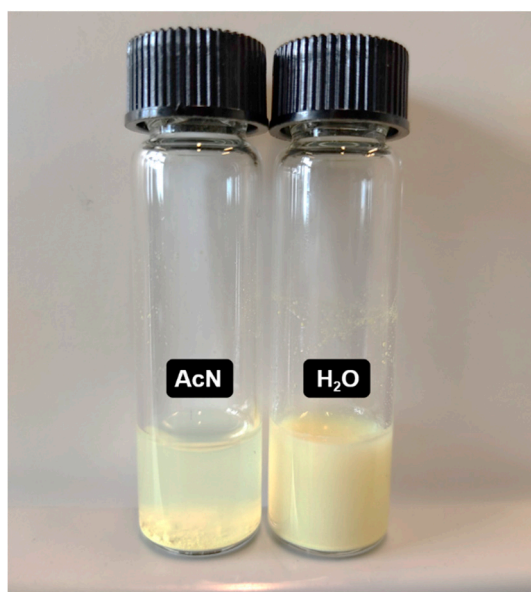

**Figure S4.** Difference between (Na)PHI suspension in water (H<sub>2</sub>O) and acetonitrile (AcN).

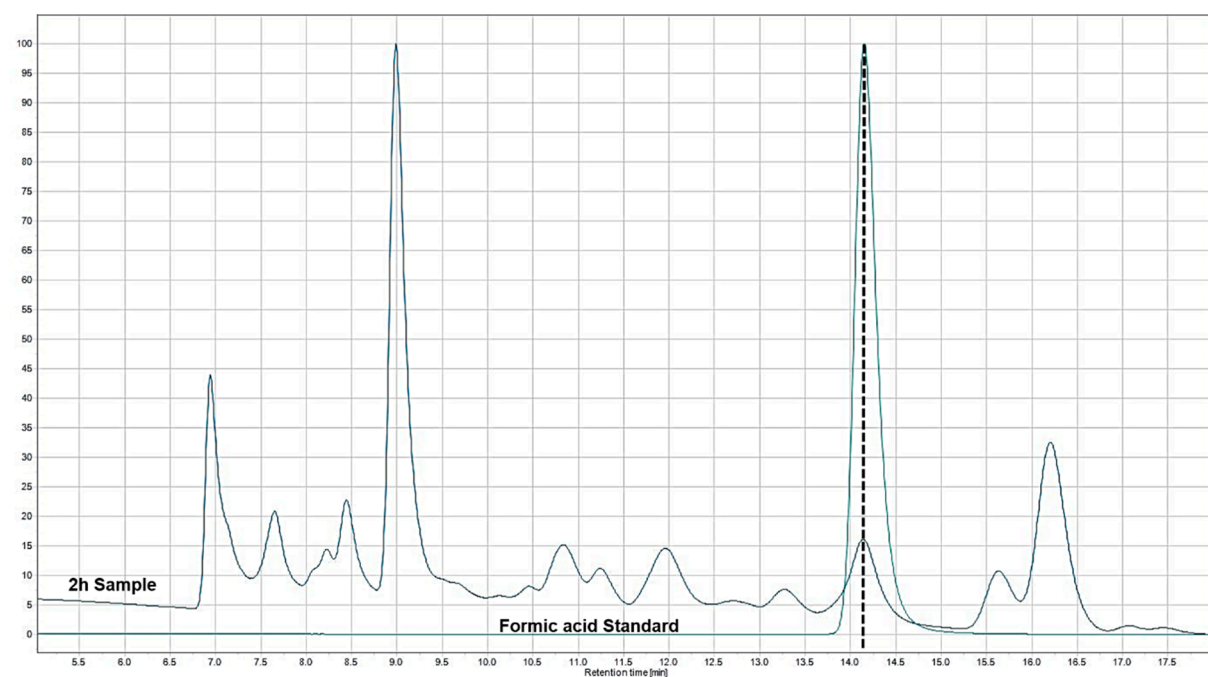

**Figure S5.** Chromatographic run of the sample collected after 2h of reaction overlapped with formic acid standard.

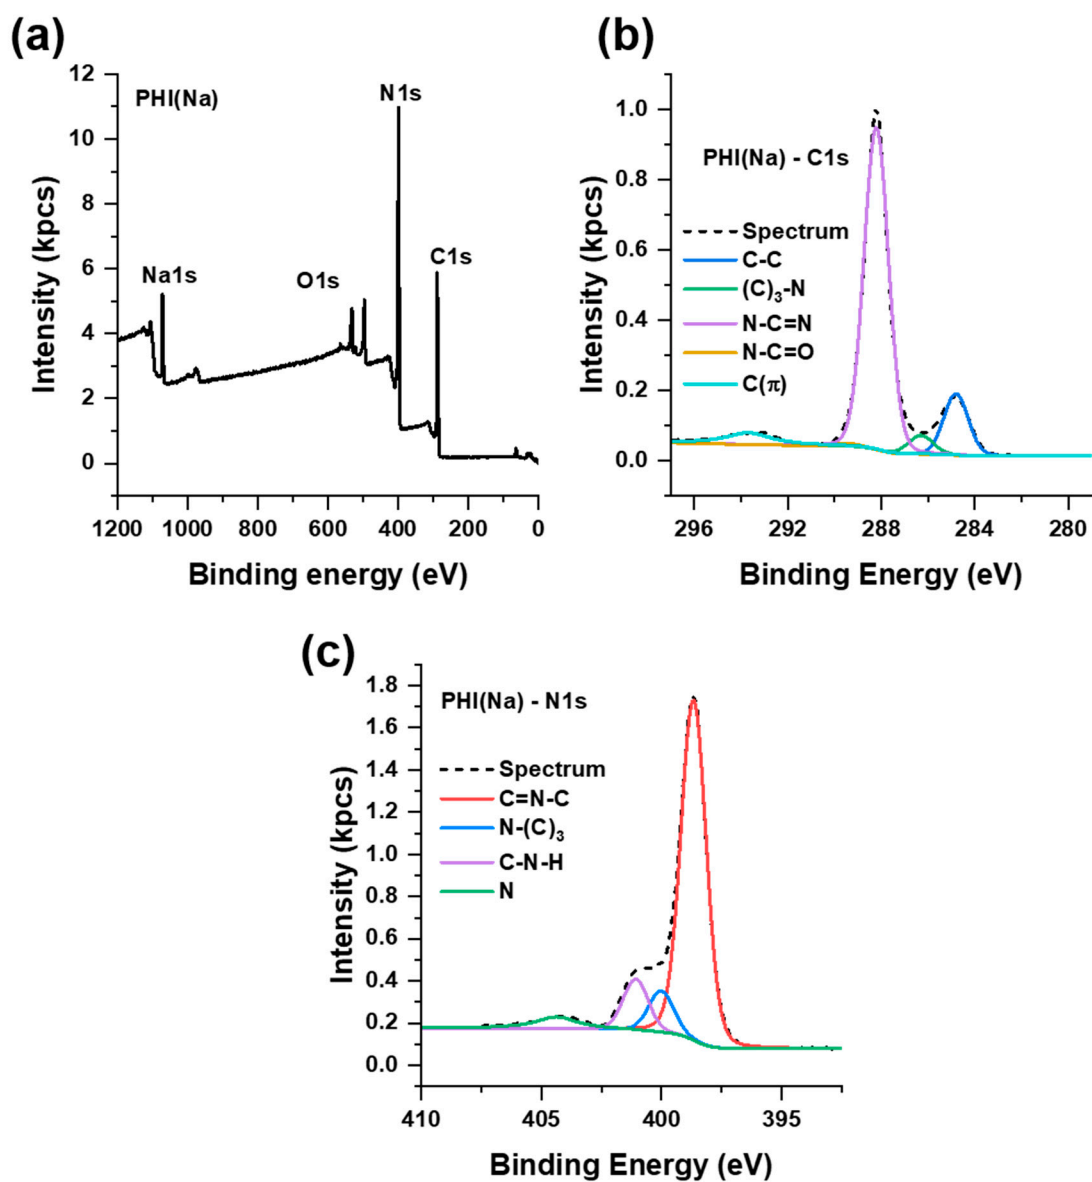

**Figure S6.** (a) Survey, high resolution spectra of (b) C 1s and (c) N 1s bind energy range for PHI(Na)

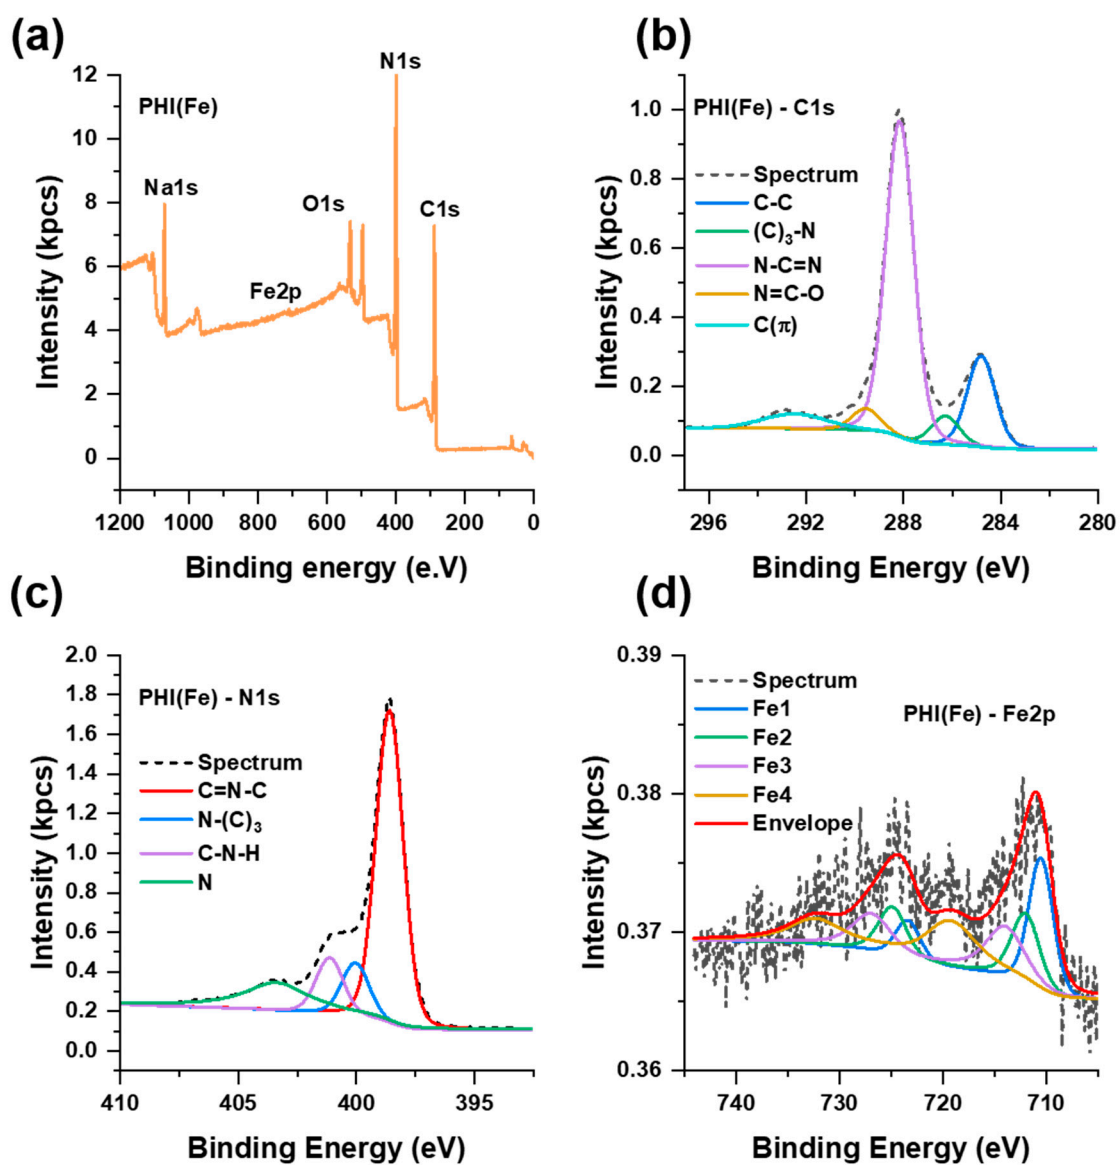

**Figure S7.** (a) Survey, high resolution spectra of (b) C 1s, (c) N 1s and (d) Fe 2p binding energy range for 0.1 wt% PHI(Fe).

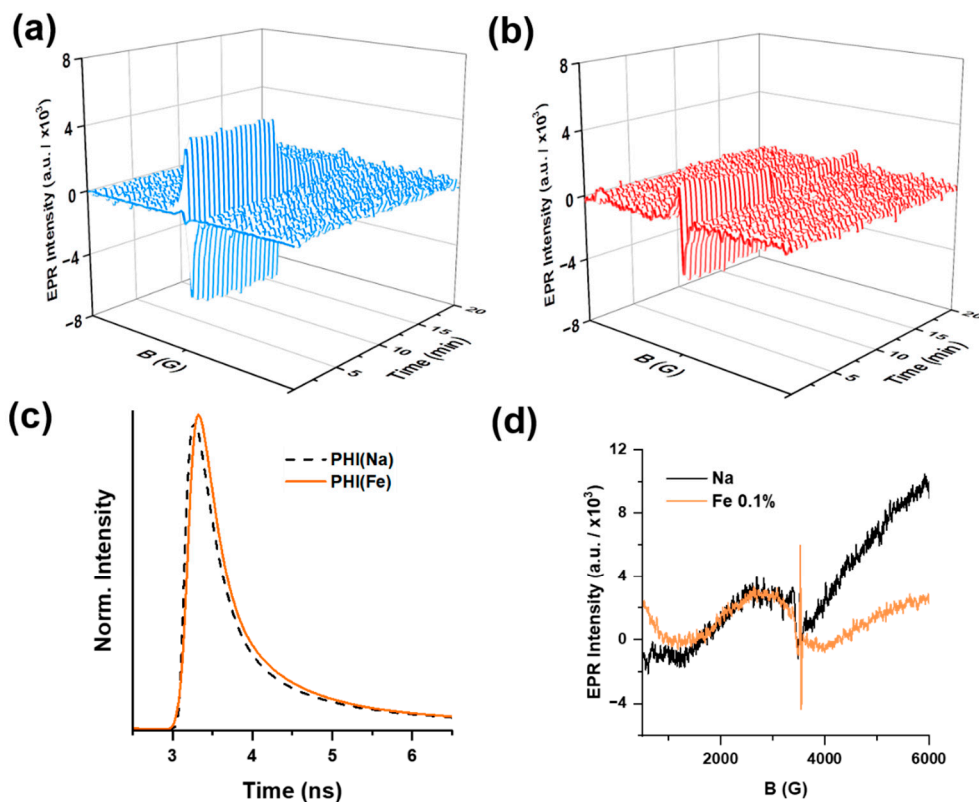

**Figure S8.** EPR spectra over time recorded in light ON for 10 min and then light OFF for 10 min obtained from (a) 1 wt% Fe PHI (b) 2 wt% Fe PHI, (c) TRPL for PHI(Na) and 0.1 wt% Fe PHI aqueous 5 mM HMF suspensions saturated with  $O_2$  and (d) EPR spectra recorded for PHI(Na) and PHI(Fe) in dark showing the intrinsic signal of carbon nitride at  $g = 2.004$ .

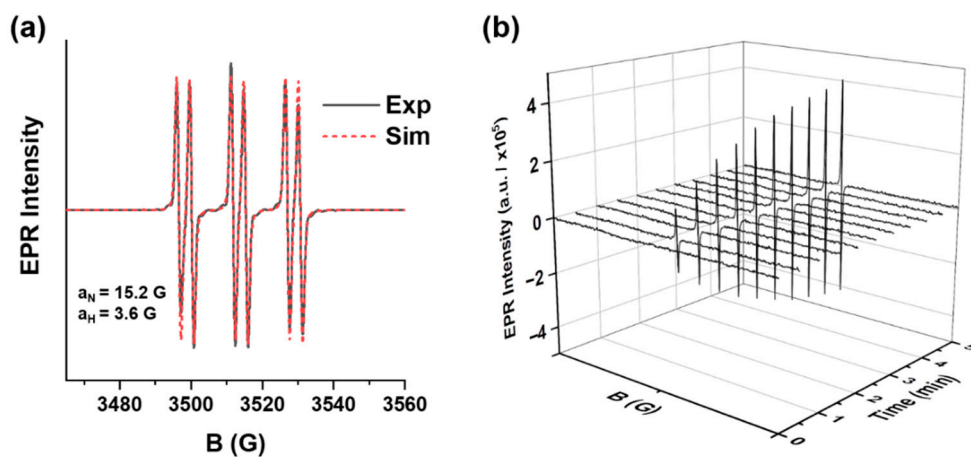

**Figure S9.** (a) Experimental and simulated spectra of  $\alpha$ -hydroxy ethyl spin adduct of PBN obtained in 5mM HMF with 10% EtOH aqueous solution with 0.1 wt% Fe PHI, irradiated by a Xenon lamp with a  $>420$  nm cut off filter; (b) 5mM HMF suspension of 0.1 wt% PHI(Fe) in Ar atmosphere irradiated over time.

**Table S1.** Theoretical amount of metal compared with experimental result of ICP-OES.

| Photocatalyst | Metal (% m/m) |              |
|---------------|---------------|--------------|
|               | Theoretical   | Experimental |
| PHI(Fe)       | 0.1           | 0.1          |
| PHI(Co)       | 0.1           | 0.06         |
| PHI(Cu)       | 0.1           | 0.3          |
| PHI(Fe)       | 0.1           | 0.1          |
| PHI(Fe) 1%    | 1.0           | 0.9          |
| PHI(Fe) 2%    | 2.0           | 2.3          |
| PHI(Ni) 1%    | 1.0           | 1.0          |
| PHI(Ni) 2%    | 2.0           | 2.1          |

**Table S2.** DFF production rate comparing this work with literature results on HMF oxidation in aqueous medium in O<sub>2</sub> atmosphere.

| Photocatalyst                                                                        | DFF ( $\mu\text{mol.g}^{-1}.\text{h}^{-1}$ ) | Ref.      |
|--------------------------------------------------------------------------------------|----------------------------------------------|-----------|
| PHI(Fe)                                                                              | 393.0                                        | This work |
| Ti <sub>3</sub> C <sub>2</sub> F <sub>x</sub> MXene/CdIn <sub>2</sub> S <sub>4</sub> | 125.6                                        | [1]       |
| MoS <sub>2</sub> /CdIn <sub>2</sub> S <sub>4</sub> (12.5%)                           | 49.2                                         | [2]       |
| CTF Th@SBA-15                                                                        | 190.0                                        | [3]       |
| g-C <sub>3</sub> N <sub>4</sub>                                                      | 26.7                                         | [4]       |
| 1.5% Fe (III)/BMO                                                                    | 77.7                                         | [5]       |
| 12% Bi <sub>2</sub> WO <sub>6</sub> /mpg-C <sub>3</sub> N <sub>4</sub>               | 0.2                                          | [6]       |
| Zn <sub>0.5</sub> Cd <sub>0.5</sub> S/1%MnO <sub>2</sub>                             | 303.9                                        | [7]       |



## References

- [1] M. Zhang, Y. Zhang, L. Ye, Z. Yu, R. Liu, Y. Qiao, L. Sun, J. Cui, X. Lu, In situ fabrication Ti<sub>3</sub>C<sub>2</sub>F<sub>x</sub> MXene/CdIn<sub>2</sub>S<sub>4</sub> Schottky junction for photocatalytic oxidation of HMF to DFF under visible light, *Appl. Catal. B Environ.* 330 (2023) 122635. <https://doi.org/10.1016/j.apcatb.2023.122635>.
- [2] Q. Zhu, Y. Zhuang, H. Zhao, P. Zhan, C. Ren, C. Su, W. Ren, J. Zhang, D. Cai, P. Qin, 2,5-Diformylfuran production by photocatalytic selective oxidation of 5-hydroxymethylfurfural in water using MoS<sub>2</sub>/CdIn<sub>2</sub>S<sub>4</sub> flower-like heterojunctions, *Chinese J. Chem. Eng.* 54 (2023) 180–191. <https://doi.org/10.1016/j.cjche.2022.04.018>.
- [3] C. Ayed, W. Huang, G. Kizilsavas, K. Landfester, K.A.I. Zhang, Photocatalytic Partial Oxidation of 5-Hydroxymethylfurfural (HMF) to 2,5-Diformylfuran (DFF) Over a Covalent Triazine Framework in Water, *ChemPhotoChem.* 4 (2020) 571–576. <https://doi.org/10.1002/cptc.202000070>.
- [4] Q. Wu, Y. He, H. Zhang, Z. Feng, Y. Wu, T. Wu, Photocatalytic selective oxidation of biomass-derived 5-hydroxymethylfurfural to 2,5-diformylfuran on metal-free g-C<sub>3</sub>N<sub>4</sub> under visible light irradiation, *Mol. Catal.* 436 (2017) 10–18. <https://doi.org/10.1016/j.mcat.2017.04.012>.
- [5] J. Xue, C. Huang, Y. Zong, J. Gu, M. Wang, S. Ma, Fe (III)-grafted Bi<sub>2</sub>MoO<sub>6</sub> nanoplates for enhanced photocatalytic activities on tetracycline degradation and HMF oxidation, *Appl. Organomet. Chem.* 33 (2019) 1–10. <https://doi.org/10.1002/aoc.5187>.
- [6] L. Cheng, D. Huang, Y. Zhang, Y. Wu, Photocatalytic selective oxidation of HMF to DFF over Bi<sub>2</sub>WO<sub>6</sub>/mpg-C<sub>3</sub>N<sub>4</sub> composite under visible light, *Appl. Organomet. Chem.* 35 (2021) 1–9. <https://doi.org/10.1002/aoc.6404>.
- [7] S. Dhingra, T. Chhabra, V. Krishnan, C.M. Nagaraja, Visible-Light-Driven Selective Oxidation of Biomass-Derived HMF to DFF Coupled with H<sub>2</sub> Generation by Noble Metal-Free Zn<sub>0.5</sub>Cd<sub>0.5</sub>S/MnO<sub>2</sub> Heterostructures, *ACS Appl. Energy Mater.* 3 (2020) 7138–7148. <https://doi.org/10.1021/acsaem.0c01189>.
